# Supplementary material for: Mexico’s battle with monopolies: reputation-based autonomy and self-undermining effects in antitrust enforcement
Source: Oxford University Press journal article supplement (doi:10.1093/ser/mwae036), 2024-05-09
Supplement: mwae036_supplementary_data.docx [file mwae036_supplementary_data.docx]

**ONLINE APPENDIX**

**List of all interviews and interviewees**

| **NO** | **Interview Date** | **Description** | **Present or past experience working inside MCA or at lawmaking?*** |
| --- | --- | --- | --- |
| 1 | January 22nd, 2019 | Chief case-handler at the MCA | present |
| 2 | January 22nd, 2019 | Case-handler at the MCA | present |
| 3 | January 23rd, 2019 | Academic consultant | no experience |
| 4 | January 28th, 2019 | Senior administrator at the MCA | present |
| 5 | January 28th, 2019 | Chief case-handler at the MCA | present |
| 6 | January 29th, 2019 | Chief case-handler at the MCA | present |
| 7 | January 29th, 2019 | Case-handler at the MCA | present |
| 8 | January 29th, 2019 | Case-handler at the MCA | present |
| 9 | January 30th, 2019 | Academic consultant | no experience |
| 10 | January 31st, 2019 | Administrator at the Mexican Energy Regulator, previously chief case-handler at the MCA | past |
| 11 | January 31st, 2019 | Administrator at the Mexican Energy Regulator, previously case-handler at the MCA | past |
| 12 | February 5th, 2019 | Lawyer at a law firm | no experience |
| 13 | February 6th, 2019 | Commissioner at the MCA | present |
| 14 | February 6th, 2019 | Case-handler at the MCA | present |
| 15 | February 6th, 2019 | Case-handler at the MCA | present |
| 16 | February 6th, 2019 | Academic consultant, previously chief case-handler at the MCA | past |
| 17 | February 7th, 2019 | Academic consultant | no experience |
| 18 | February 8th, 2019 | Lawyer at a law firm | no experience |
| 19 | February 8th, 2019 | Lawyer at a law firm | no experience |
| 20 | February 11th, 2019 | Judge in federal courts | no experience |
| 21 | February 11th, 2019 | Lawyer at a law firm, previously chief case-handler at the MCA | past |
| 22 | February 12th, 2019 | Consultant at a law firm, previously senior administrator at the MCA | past |
| 23 | February 12th, 2019 | Senior administrator at the MCA | present |
| 24 | February 14th, 2019 | Lawyer at a law firm | no experience |
| 25 | February 19th, 2019 | Lawyer at a law firm | no experience |
| 26 | February 19th, 2019 | President of the MCA | present |
| 27 | February 20th, 2019 | Lawyer at a law firm, previously case-handler at the MCA | past |
| 28 | February 26th, 2019 | Lawyer at a law firm, previously case-handler at the MCA | past |
| 29 | February 26th, 2019 | Chief case-handler at the MCA | present |
| 30 | February 27th, 2019 | Chief case-handler at the MCA | present |
| 31 | February 27th, 2019 | Lawyer at a law firm, participated in the drafting of the law | past |
| 32 | March 4th, 2019 | Lawyer at a law firm, previously commissioner of the MCA | past |
| 33 | March 5th, 2019 | Lawyer at a law firm | no experience |
| 34 | March 5th, 2019 | Lawyer at a law firm | no experience |
| 35 | March 5th, 2019 | Lawyer at a law firm, previously commissioner of the MCA | past |
| 36 | March 6th, 2019 | Lawyer at a law firm, previously chief case-handler at the MCA | past |
| 37 | March 6th, 2019 | Chief case-handler at the MCA | present |
| 38 | March 7th, 2019 | Lawyer at a law firm, previously chief case-handler at the MCA | past |
| 39 | March 8th, 2019 | Chief case-handler in the Mexican Telecommunications Regulator, previously chief case-handler at the MCA | past |
| 40 | March 8th, 2019 | Case-handler in the Mexican Telecommunications Regulator, previously case-handler at the MCA | past |
| 41 | March 8th, 2019 | Case-handler in the Mexican Telecommunications Regulator, previously case-handler at the MCA | past |
| 42 | March 11th, 2019 | Lawyer at a law firm | no experience |
| 43 | March 11th, 2019 | Lawyer at a law firm | no experience |
| 44 | March 12th, 2019 | Consultant at a law firm, previously president of the MCA | past |
| 45 | March 13th, 2019 | Reporter to OECD | no experience |
| 46 | March 13th, 2019 | Lawyer at a law firm | no experience |
| 47 | March 14th, 2019 | Academic consultant, previously chief case-handler at the MCA | past |
| 48 | March 15th, 2019 | Academic consultant, previously chief case-handler at the MCA | past |

*the experience was coded relative to the interview date.

**Basic summary information on the interviewees**

|  | **Number of Interviewees** |
| --- | --- |
| **Occupation at the time of the interview** | |
| Lawyer at a law firm | 18 |
| Senior case-handler in Competition Authority | 6 |
| Academic consultant | 6 |
| Case-handler in Competition Authority | 5 |
| Employee of the Energy Regulator | 2 |
| Employee of the Telecommunications Regulator | 3 |
| Consultant at a law firm | 2 |
| Senior Administrator at the Competition Authority | 2 |
| President of the Competition Authority | 1 |
| Commissioner of the Competition Authority | 1 |
| Federal Court Judge | 1 |
| Reporter for the OECD | 1 |
| **Present or past experience working in the Mexican Competition Authority and/or legislation of the Mexican Competition Laws** | |
| YES | 33 |
| NO | 15 |
| **SUM** | **48** |

**Methodology used to collect enforcement statistics**

Using Mexican Competition Authority’s online database, accessible at < <https://www.cofece.mx/conocenos/pleno/resoluciones-y-opiniones/>> This database includes all the resolutions for cases that resulted in sanctions from 1993 to 2006, and all resolutions, including those without sanctions, issued since 2006. On January 5th, 2023, I downloaded all the resolved cases (*resultados*) related to the enforcement of relative monopolistic practices (*Práctica monopólica relativa*).

From this dataset, I filtered out the resolutions that closed investigations without sanctions for lack of elements, discarded information, lack of relevance to competition laws, and retracted complaints. I only included the cases that concluded with a compromise, sanction and a compromise, and sanction. I combined the data for cases that were combined in a single resolution. There were 56 cases found as a result of this process.

Then I noted the resolutions that were appealed in the courts and resulted in a second investigation and resolution by the authority. I corrected the information on the initial dates of enforcement and the original fines imposed by downloading and reading the resolutions that were appealed.

I then filtered out the cases that were resolved without a fine and sanction, which left me with 36 cases. I calculated the fine amounts originally reported in Mexican peso to USD using Federal Reserve Economic Data for each year.

**Mexican Competition Authority’s president and commissioners (until 2019)**

| **Commissioner** | **Training** | **Post-graduate degrees** |
| --- | --- | --- |
| **Before 2013** | | |
| Santiago Levy (President No.1) | Economist | PhD in Economics at Boston Uni |
| Pedro Bosch García | Lawyer | . |
| Javier Aguilar Alvarez de Alba | Lawyer | . |
| Leonel Pereznieto Castro | Lawyer | PhD in Law at Sorbonne |
| Fernando Heftye Etienne | Lawyer | LLM at Harvard |
| Fernando Sánchez Ugarte (President No.2) | Economist | PhD in Economics at UChicago |
| Pascual García Alba Iduñate | Economist | PhD in Economics at Yale |
| Adalberto García Rocha | Economist | PhD in Economics at Stanford |
| José Agustín Navarro Gergely | Lawyer | . |
| Eduardo Pérez Motta (President No.3) | Economist | PhD in Economics at UCLA |
| Rodrigo Morales Elcoro | Economist | PhD in Economics at UT-Austin |
| Miguel Flores Bernés | Lawyer | LLM at Warwick |
| Luis Alberto Ibarra Pardo | Economist | PhD in Economics at UCLA |
| Cristina Massa Sánchez | Lawyer | LLM at Harvard |
| **After 2013** | | |
| Alejandra Palacios Prieto (President No.4) | Economist | MBA at ITAM |
| Alejandro Ildefonso Castañeda Sabido | Economist | PhD in Economics at Stanford |
| Benjamín Contreras Astiazarán | Economist | PhD in Economics at UT-Austin |
| Eduardo Martínez Chombo | Economist | PhD in Economics at Rice Uni |
| Martín Moguel Gloria | Lawyer | LLM at Warwick |
| Jesús Ignacio Navarro Zermeño | Economist | PhD in Economics at UChicago |
| Javier Núñez Melgoza | Economist | MA in Economics at El Colegio de México |
| Alejandro Faya Rodríguez | Lawyer | LLM at Cambridge |
| Brenda Gisela Hernández Ramírez | Lawyer | LLM at Università di Bologna |
| José Eduardo Mendoza Contreras | Economist | PhD in Economics at Uni of Surrey |
